# Supplementary material for: Probiotic treatment reduces appetite and glucose level in the zebrafish model
Source: PubMed Central journal article supplement (PMC4700460; doi:10.1038/srep18061), 2016-01-05
Supplement: srep18061-s1.pdf [file srep18061-s1.pdf]

# Supplemental information

## Probiotic treatment reduces appetite and glucose level in the zebrafish model

Silvia Falcinelli<sup>1</sup>, Ana Rodiles<sup>2</sup>, Suraj Unniappan<sup>3</sup>, Simona Picchietti<sup>4</sup>, Giorgia Gioacchini<sup>1</sup>, Daniel Lee Merrifield<sup>2</sup> and Oliana Carnevali<sup>1\*</sup>

**Table S1. Primer sequences used for real-time polymerase chain reaction analyses**

| Gene           | Forward                         | Reverse                           |
|----------------|---------------------------------|-----------------------------------|
| <i>cb1</i>     | 5'- TCTGTGGGAAGCCTGTTTC -3'     | 5'- ACCGAGTTGAGCCGTTTG -3'        |
| <i>npv</i>     | 5'- GTCTGCTTGGGGACTCTCAC -3'    | 5'- CGGGACTCTGTTTCACCAAT -3'      |
| <i>leptin</i>  | 5'- AGCTCTCCGCTCAACCTGTA -3'    | 5'- CAGCGGGAATCTCTGGATAA -3'      |
| <i>mc4r</i>    | 5'- ATCTCCACGGAGGTCTTCCT -3'    | 5'- CGAAGCATTGGAGACACTCA -3'      |
| <i>glp-1</i>   | 5'- CAGAGGGAACCTTTCTCCAACGA -3' | 5'- AGTTCATACCCATTTCTCTTAGCGT -3' |
| <i>insulin</i> | 5'- TAAGCACTAACCCAGGCACA -3'    | 5'- GATTTAGGAGGAAGGAAACC -3'      |
| <i>goat</i>    | 5'- GCACACTGGAAGATGAGCGA -3'    | 5'- AACCGAAGGACGACTGGATG -3'      |
| <i>nucb2a</i>  | 5'- AGGAGCGGCATGAAGAATTT -3'    | 5'- GATGGTTGACTTTGGGGTGA -3'      |
| <i>rplp</i>    | 5'- CTGAACATCTCGCCCTTCTC -3'    | 5'- TAGCCGATCTGCAGACACAC -3'      |
| <i>actβ</i>    | 5'- GGTACCCATCTCCTGCTCCAA -3'   | 5'- GAGCGTGGCTACTCCTTCACC -3'     |

The primer sequences for, *cb1*, *npv*, *leptin*, *mc4r*, *glp-1*, *insulin*, *goat*, *nucb2a*, *rplp* and *actβ* were designed using Primer3 (210 v. 0.4.0).
